# Supplementary material for: A versatile, superelastic polystyrene/graphene capsule-like framework
Source: Royal Society of Chemistry journal article supplement (doi:10.1039/c6ta03899a), 2016-01-01
Supplement: c6ta03899a3.pdf [file c6ta03899a3.pdf]

### Supplementary Information

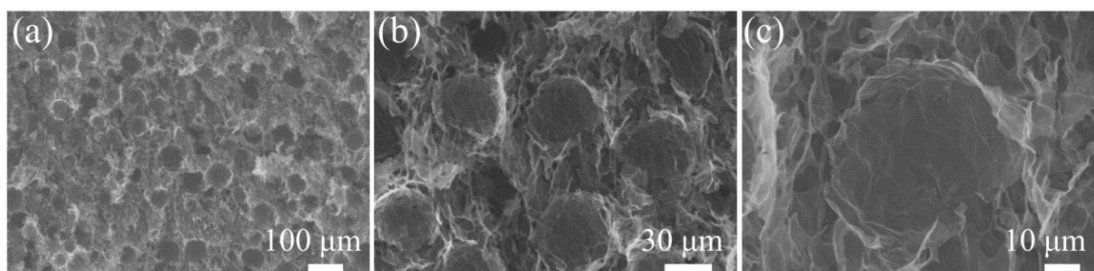

**Fig. S1** (a–c) Scanning electron microscopy (SEM) images of 3D PS-free graphene foam prepared in oil-in-water system, showing the typically cellular networks.

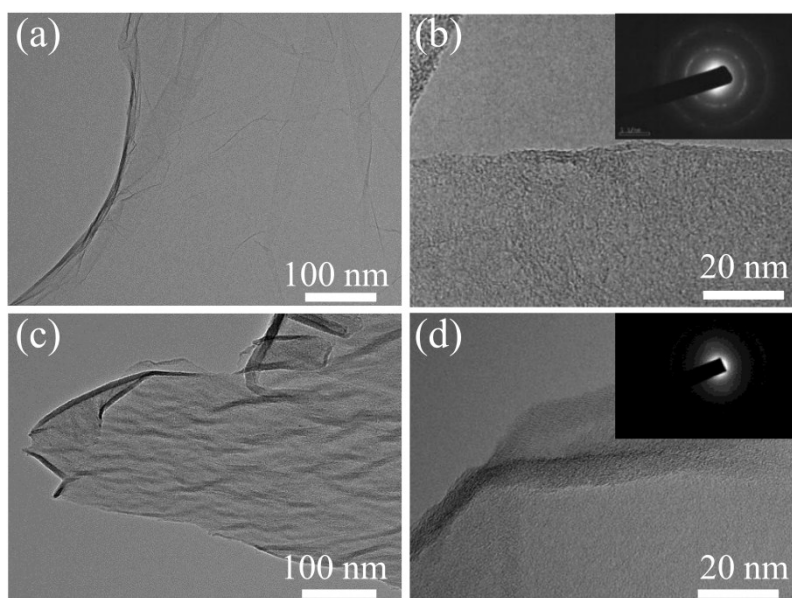

**Fig. S2** (a, b) Transmission electron microscopy (TEM) images of original reduced graphene oxide (rGO) sheets at different magnifications. Inset of (b) is the corresponding electron diffraction patterns. (c, d) TEM images of PS<sub>15</sub>/G-CF at different magnifications. Inset of (d) is the corresponding electron diffraction patterns. The electron diffraction spots of graphene sheets in (d) disappeared after combination with PS.

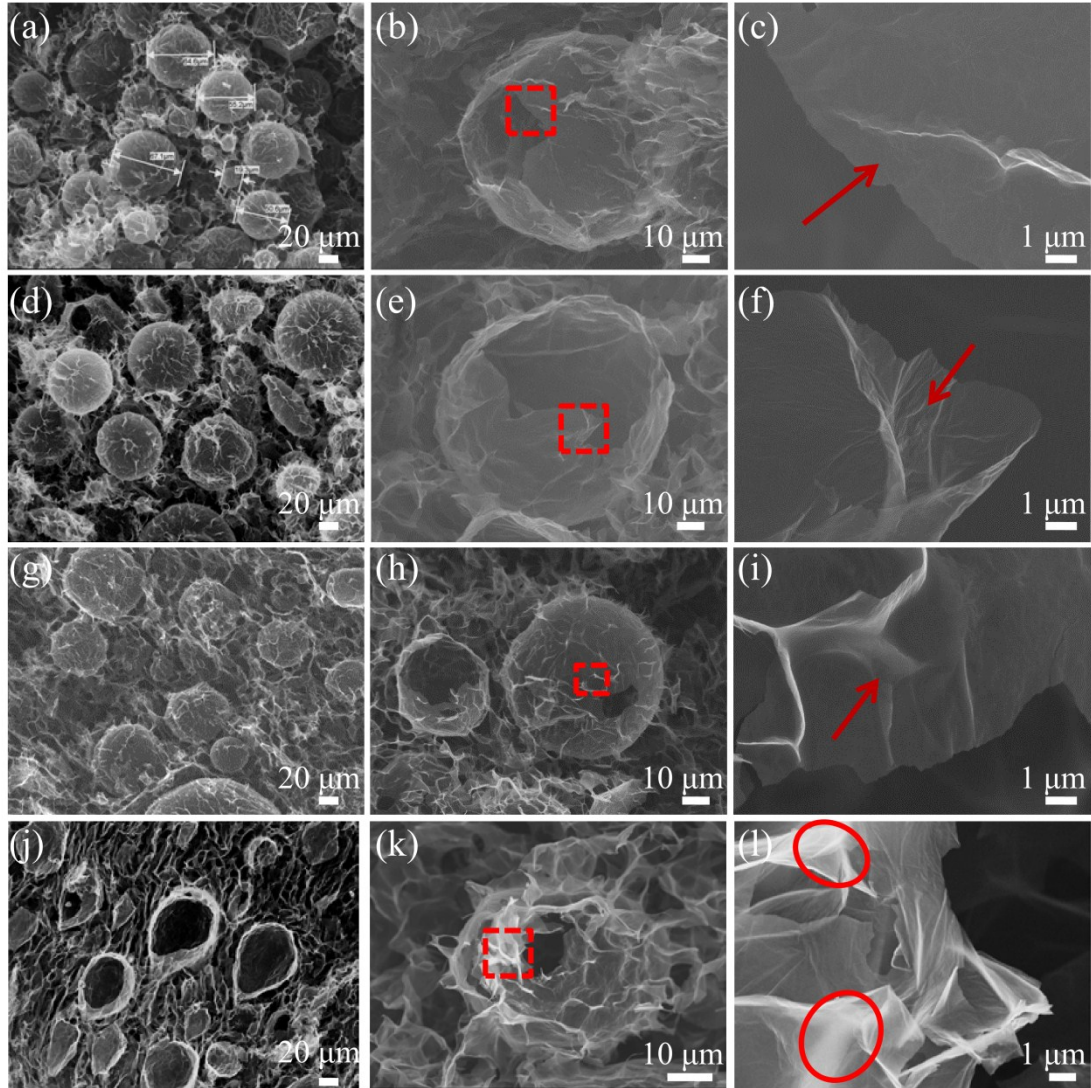

**Fig. S3** (a, b) SEM images of PS<sub>25</sub>/G-CF. (c) The corresponding enlarged image of square area in (b). (d, e) SEM images of PS<sub>40</sub>/G-CF. (f) The corresponding enlarged image of square area in (e). (g, h) SEM images of PS<sub>50</sub>/G-CF. (i) The corresponding enlarged image of square area in (h). (j, k) SEM images of PS<sub>60</sub>/G-CF. (l) The corresponding enlarged image of square area in (k).

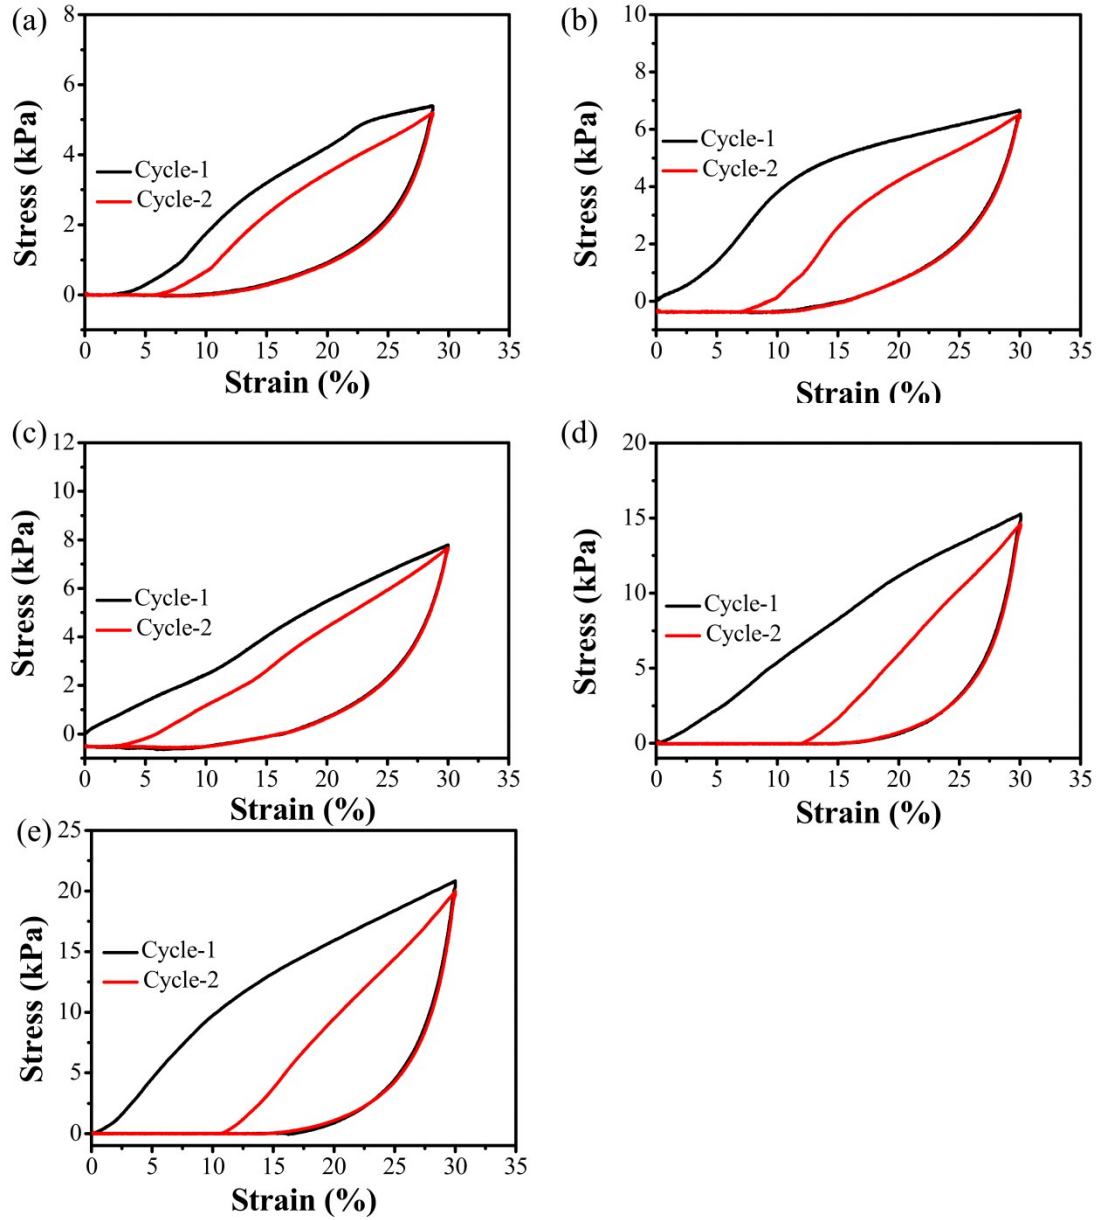

**Fig. S4** The stress-strain curves of (a) PS<sub>15</sub>/G-CF (b) PS<sub>25</sub>/G-CF (c) PS<sub>40</sub>/G-CF (d) PS<sub>50</sub>/G-CF (e) PS<sub>60</sub>/G-CF before thermal annealing. The PS<sub>n</sub>/G-CFs shows no obvious elastic behaviors at low strain of 30%.

**Table S1.** The properties of PS<sub>n</sub>/G-CFs with different weight percentage of PS.

| Samples                | Weight percentage of PS (wt%) | Density (mg cm <sup>-3</sup> ) | Maximum stain (%) | Max stress at max strain (kPa) | Conductivity (S m <sup>-1</sup> ) |
|------------------------|-------------------------------|--------------------------------|-------------------|--------------------------------|-----------------------------------|
| PS <sub>15</sub> /G-CF | 15                            | 12.47                          | 70                | 53.97                          | 4.33                              |
| PS <sub>25</sub> /G-CF | 25                            | 14.84                          | 80                | 69.29                          | 3.13                              |
| PS <sub>40</sub> /G-CF | 40                            | 19.30                          | 80                | 80.10                          | 2.27                              |
| PS <sub>50</sub> /G-CF | 50                            | 22.17                          | 95                | 164.67                         | 1.86                              |
| PS <sub>60</sub> /G-CF | 60                            | 31.52                          | 90                | 126                            | 0.98                              |

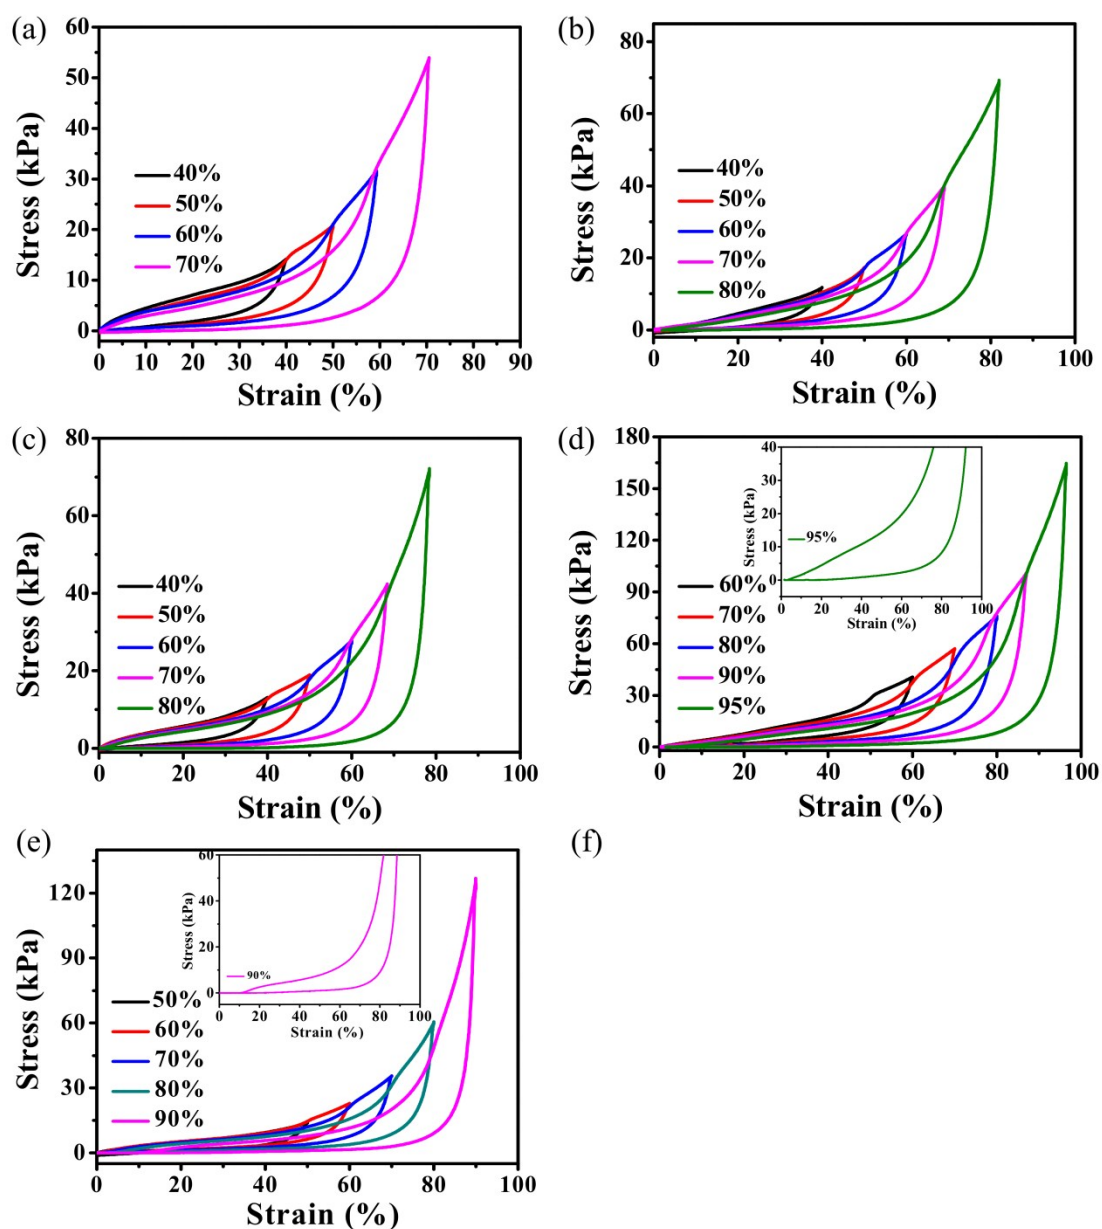

**Fig. S5** The stress-strain curves of (a) PS<sub>15</sub>/G-CF (b) PS<sub>25</sub>/G-CF (c) PS<sub>40</sub>/G-CF (d) PS<sub>50</sub>/G-CF (e) PS<sub>60</sub>/G-CF at different set strains. Inset in (d): The enlarged stress-strain curve of the sample at  $\epsilon = 95\%$ . Inset in (e): The enlarged stress-strain curve of the sample at  $\epsilon = 90\%$ .

**Table S2.** Mechanical properties of PS<sub>50</sub>/G-CFs in this work compared with other previous reported carbon-based foams in recent years.

| Samples                                | Density<br>(mg cm <sup>-3</sup> ) | Maximum stain<br>(%) | Max stress at<br>max strain<br>(kPa) | Ref. |
|----------------------------------------|-----------------------------------|----------------------|--------------------------------------|------|
| This work                              | 22.17                             | 95                   | 165                                  |      |
| Macroporous graphene monoliths         | 12.32                             | 50                   | 31.94                                | 28   |
| Graphene foam cellular networks        | 17                                | 50                   | 45                                   | 36   |
| Poly(dimethylsiloxane)/graphene foam   | –                                 | 90                   | 43                                   | 38   |
| Sponge-like carbonaceous aerogels      | 58                                | 50                   | 110                                  | 43   |
| Commercial polyurethane/graphene foams | 25-30                             | 80                   | 150                                  | 44   |
| Commercial polyurethane sponge         | 25-30                             | 80                   | 12                                   | 45   |

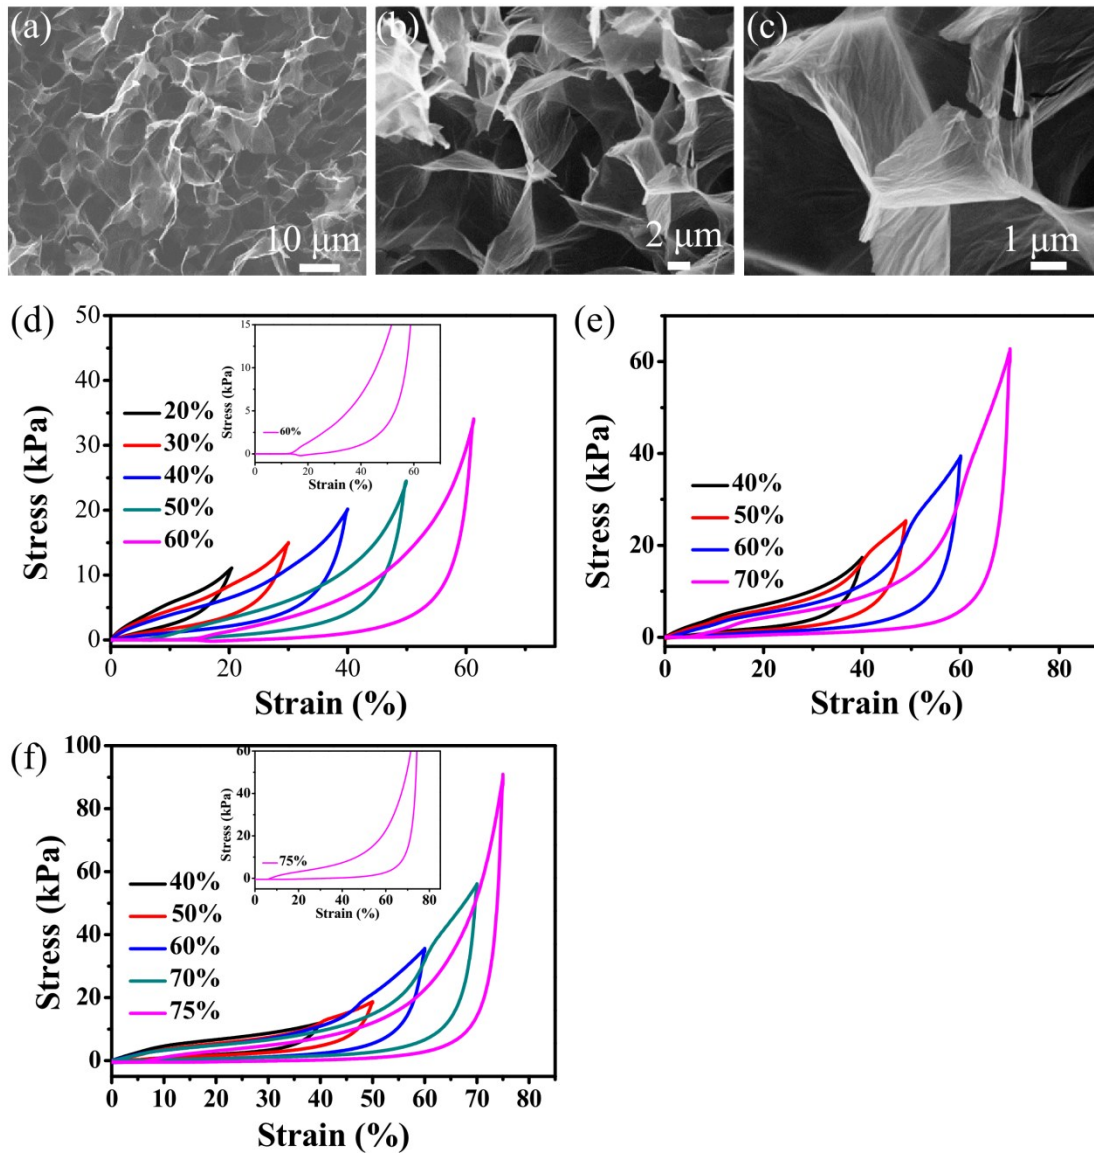

**Fig. S6** SEM images of (a–c) 3D PS/G foam without capsule-like networks at different magnifications. The stress-strain curves of (d) PS-free 3D rGO foam with usual cellular networks prepared in oil-in-water system and (e) 3D PS<sub>50</sub>/G foam without capsule-like structures. Inset: The enlarged stress-strain curve of the sample at  $\epsilon = 60\%$ . (f) The stress-strain curves of PS<sub>50</sub>/G-CF with the thermal annealing temperature of 300 °C. Inset: The enlarged stress-strain curve of the sample at  $\epsilon = 75\%$ .

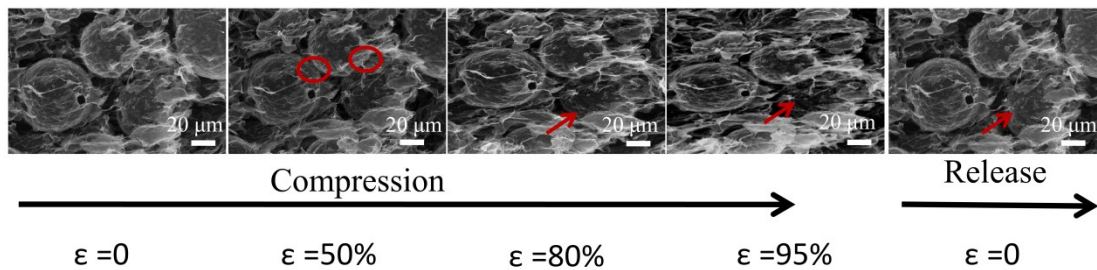

**Fig. S7** SEM images of loading and unloading states of PS<sub>50</sub>/G-CF during squeezing, the graphene capsules volume remained constant during the compression process.

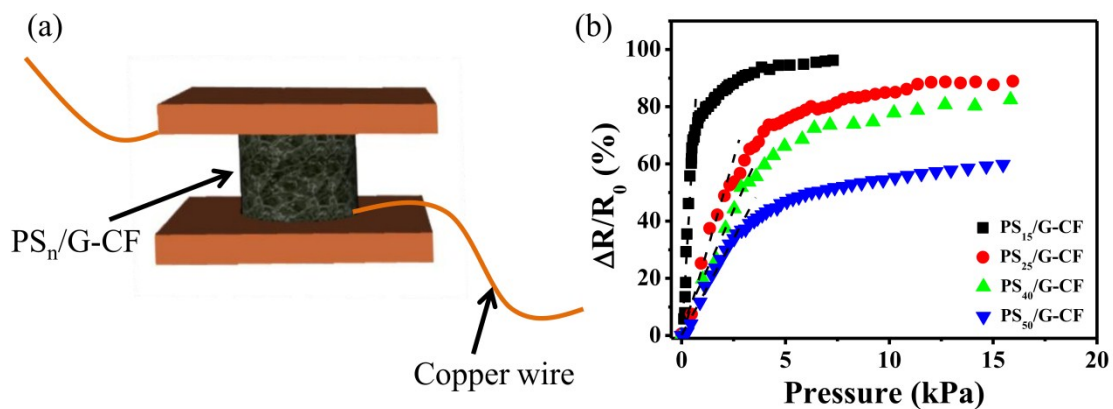

**Fig. S8** (a) The illustration of the test setup for the dynamic resistance variation ratio. (b) Electrical responses of  $PS_n/G-CFs$  ( $n=15, 25, 40, 50$ ). The slope of each curve indicates the sensitivity of each sample to pressure.

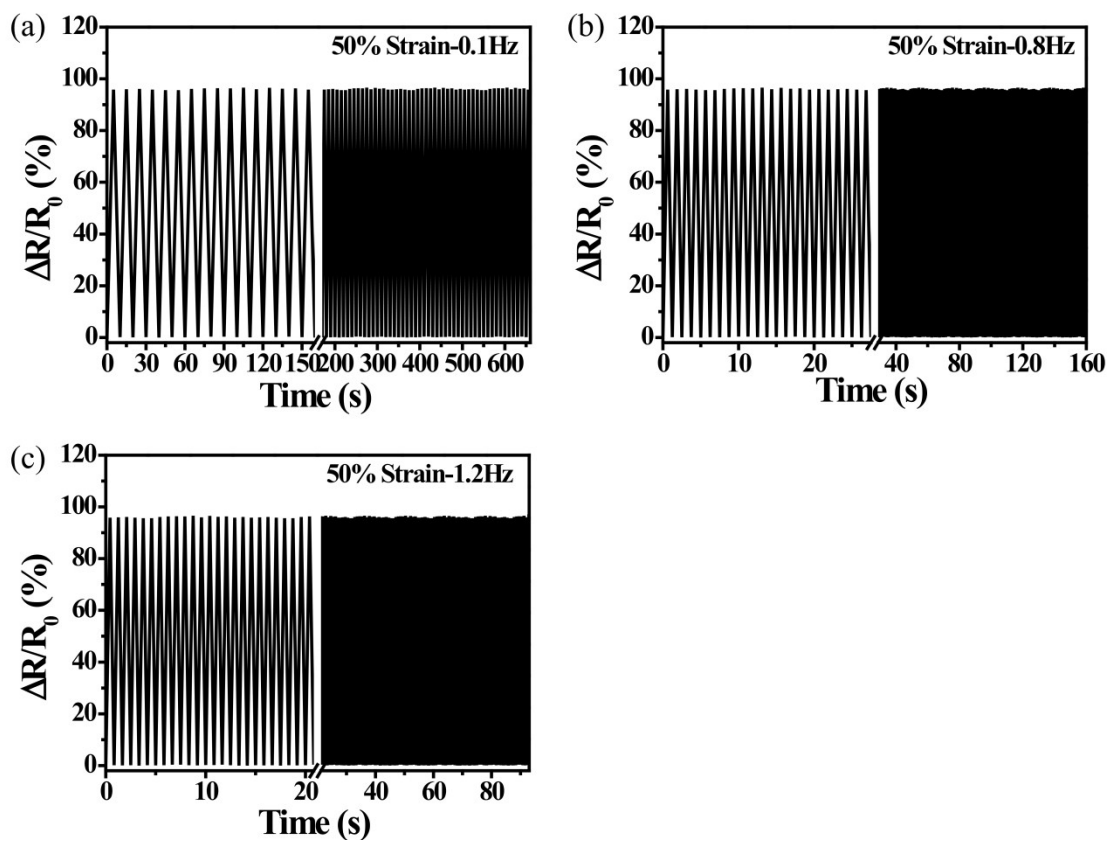

**Fig. S9** Cycling stability test of  $PS_{15}/G-CF$  under the applied strain of 50% with the loading frequency of (a) 0.1 Hz (b) 0.8 Hz and (c) 1.2 Hz, respectively.
